# Supplementary material
Source: ML conference proceedings conference paper supplement (https://openaccess.thecvf.com/content/CVPR2025/html/Chang_Unified_Medical_Lesion_CVPR_2025_paper.html)
Supplement: Supplementary file 1 [file Chang_Unified_Medical_Lesion_CVPR_2025_supplemental.pdf]

# Unified Medical Lesion Segmentation via Self-referring Indicator

## Supplementary Material

### 6. More Details of Experiments

#### 6.1. Training Details

We present the implementation details of the “Separate BP - Average Update” in Algorithm 1. During the practical training phase, we set  $B = 4$ , *i.e.*, each image in the query uses the same reference set.

#### 6.2. Training Details of Other Methods

In our experiments, we reproduce or fine-tune some other methods. For UNet [35], TransUNet [9], and RollingUNet [27], we adopt the same settings as ours. For Spider [61], we train it from scratch using the training settings from its paper. As for SegGPT [50], we initialize the model parameters with the weights provided, then fine-tune for 50 epochs on our dataset with a learning rate of 0.00001 and 1 reference image.

### 7. More Qualitative Results

For the sake of presentation, the prediction results shown in the paper all use one image as the reference set. In this section, we present more qualitative results with 4 reference images, as shown in Fig. 5 6 7 8.

---

**Algorithm 1** “Separate BP - Average Update”

---

*Training iteration with  $N = 12$  and  $B = 1$ .*

**Require:** A batch  $D = \{D_t\}_{t=1}^8$  and  $Q = \{Q_t\}_{t=1}^8$ .  $D_t$  and  $Q_t$  are  $N$  and  $B$  image-mask pairs randomly selected from training set of task  $t$ .

```
1: create reference image tensor  $I_r \in \mathbb{R}^{8 \times N \times 3 \times H \times W}$  from  $D$ 
2: create reference mask tensor  $M_r \in \mathbb{R}^{8 \times N \times 1 \times H \times W}$  from  $D$ 
3: create query image tensor  $I_q \in \mathbb{R}^{8 \times B \times 3 \times H \times W}$  from  $Q$ 
4: create query mask tensor  $M_q \in \mathbb{R}^{8 \times B \times 1 \times H \times W}$  from  $Q$ 
5:  $avg\_grads \leftarrow []$  // empty list
6: for each  $param$  in  $SR-ICL.parameters()$  do
7:    $zero\_tensor \leftarrow torch.zeros.like(param)$ 
8:    $avg\_grads.append(zero\_tensor)$ 
9: end for
10:  $L \leftarrow 0$ 
11: for  $t \leftarrow 1, 8$  do
12:    $R_t^I \leftarrow I_r[t, \dots]$  // reference images
13:    $R_t^M \leftarrow M_r[t, \dots]$  // reference masks
14:    $P_t^I \leftarrow I_q[t, \dots]$  // query images
15:    $P_t^M \leftarrow M_q[t, \dots]$  // query masks
16:    $P_t \leftarrow SR-ICL(R_t^I, R_t^M, P_t^I)$  // get prediction
17:    $L \leftarrow Loss(P_t, P_t^M)$ 
18:    $zero\_grad(optimizer)$ 
19:    $backward(L)$  // get gradients
20:   for each  $(avg\_grad, param)$  in  $(avg\_grads, SR-ICL.parameters())$  do
21:      $avg\_grad \leftarrow avg\_grad + param.grad$ 
22:   end for
23: end for
24: for each  $(param, avg\_grad)$  in  $(SR-ICL.parameters(), avg\_grads)$  do
25:    $param.grad \leftarrow (\frac{avg\_grad}{8})$  // average gradients
26: end for
27:  $step(optimizer)$  // update parameters
```

---

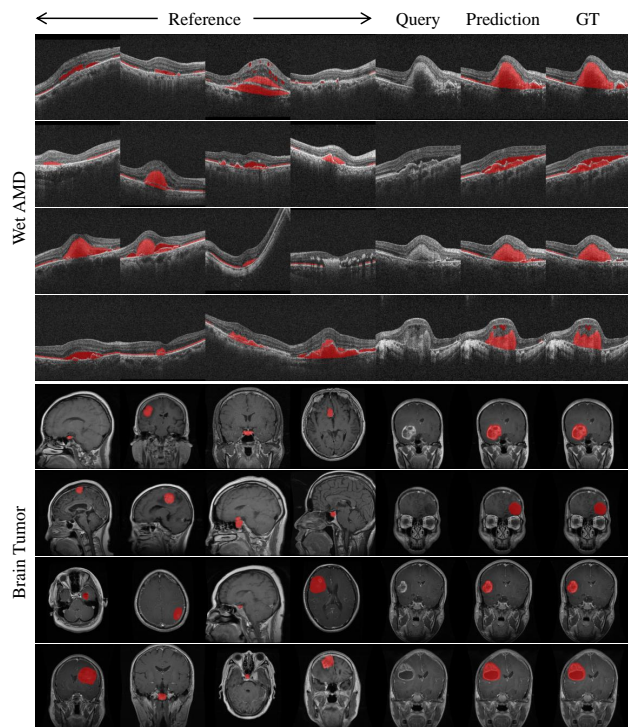

Figure 5. More results for Wet AMD and Brain Tumor.

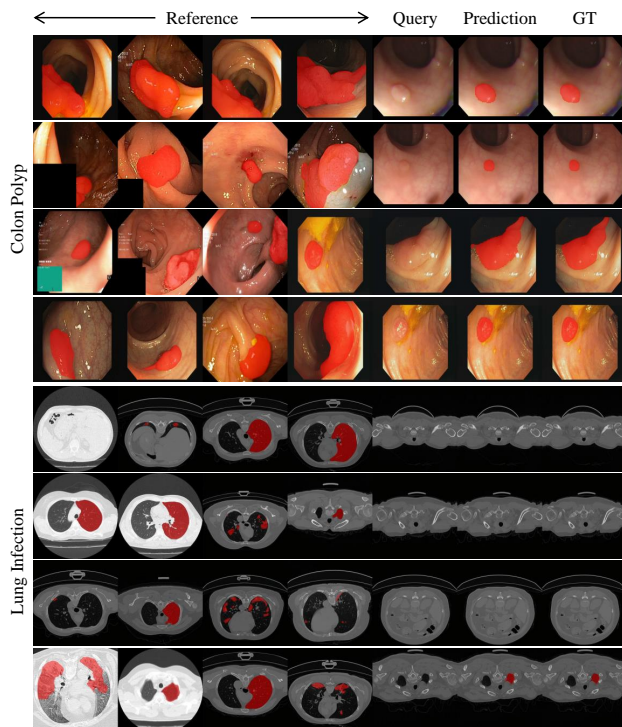

Figure 7. More results for Colon Polyp and Lung Infection.

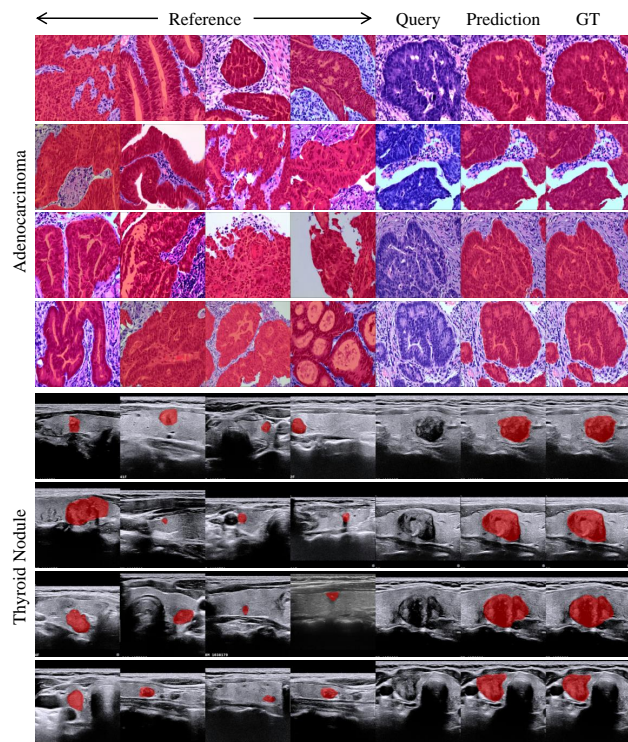

Figure 6. More results for Adenocarcinoma and Thyroid Nodule.

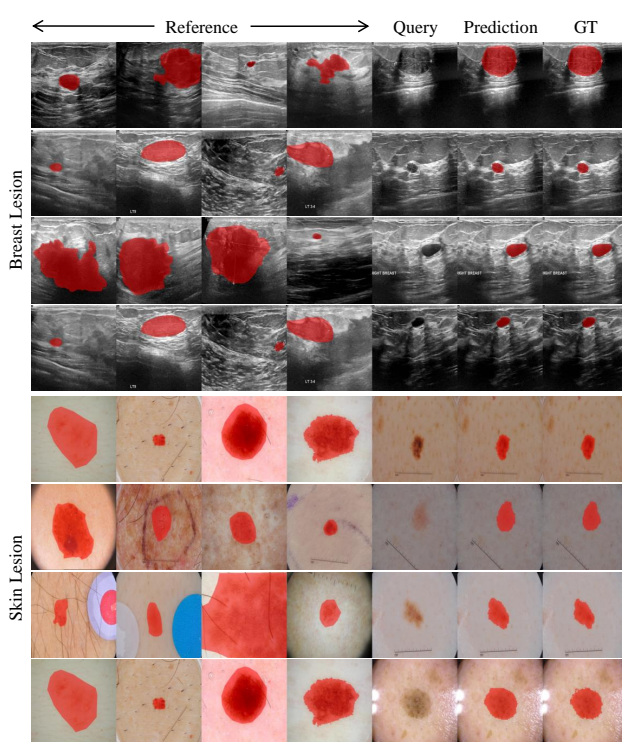

Figure 8. More results for Breast Lesion and Skin Lesion.
